# Supplementary material for: How a Retrotransposon Exploits the Plant's Heat Stress Response for Its Activation
Source: PubMed Central journal article supplement (PMC3907296; doi:10.1371/journal.pgen.1004115), 2014-01-30

CyMATE (c) 2007, 2008  
 Methylation overview of 'convertedColM.afa'

Class 1: ● me    ○ not me  
 Class 2: ■ me    □ not me  
 Class 3: ▲ me    ▼ not me

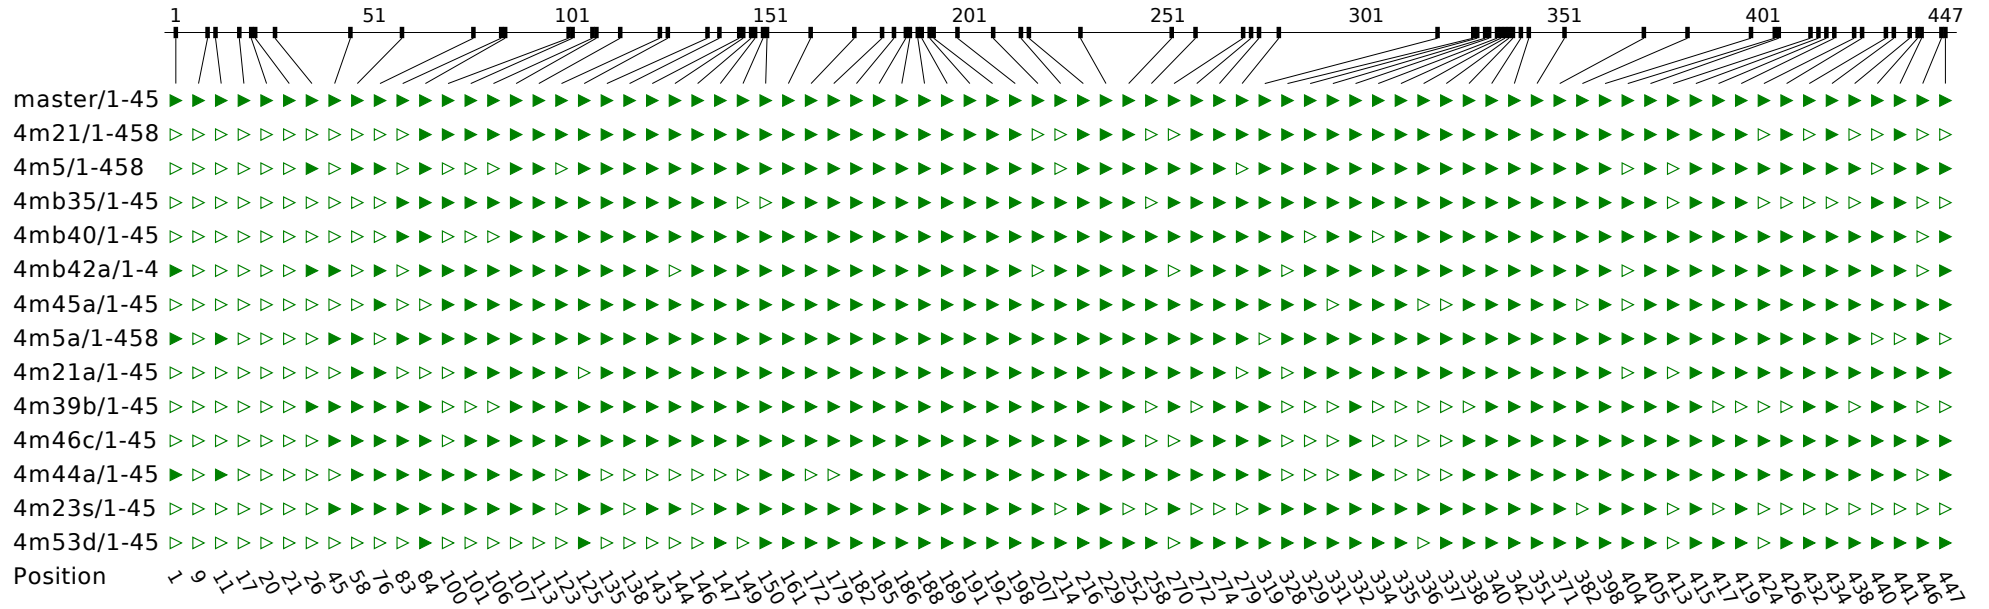

CyMATE (c) 2007, 2008  
Methylation overview of 'convertedColM.afa'

Class 1: ● me      ○ not me  
Class 2: ■ me      □ not me  
Class 3: ► me      ▷ not me

448  
↑  
master/1-45 ►  
4m21/1-458 ►  
4m5/1-458 ►  
4mb35/1-45 ►  
4mb40/1-45 ►  
4mb42a/1-4 ►  
4m45a/1-45 ►  
4m5a/1-458 ►  
4m21a/1-45 ►  
4m39b/1-45 ►  
4m46c/1-45 ►  
4m44a/1-45 ►  
4m23s/1-45 ►  
4m53d/1-45 ►  
Position 449

CyMATE (c) 2007, 2008  
 Methylation overview of 'converted Col HS.afa'

Class 1: ● me    ○ not me  
 Class 2: ■ me    □ not me  
 Class 3: ▲ me    ▼ not me

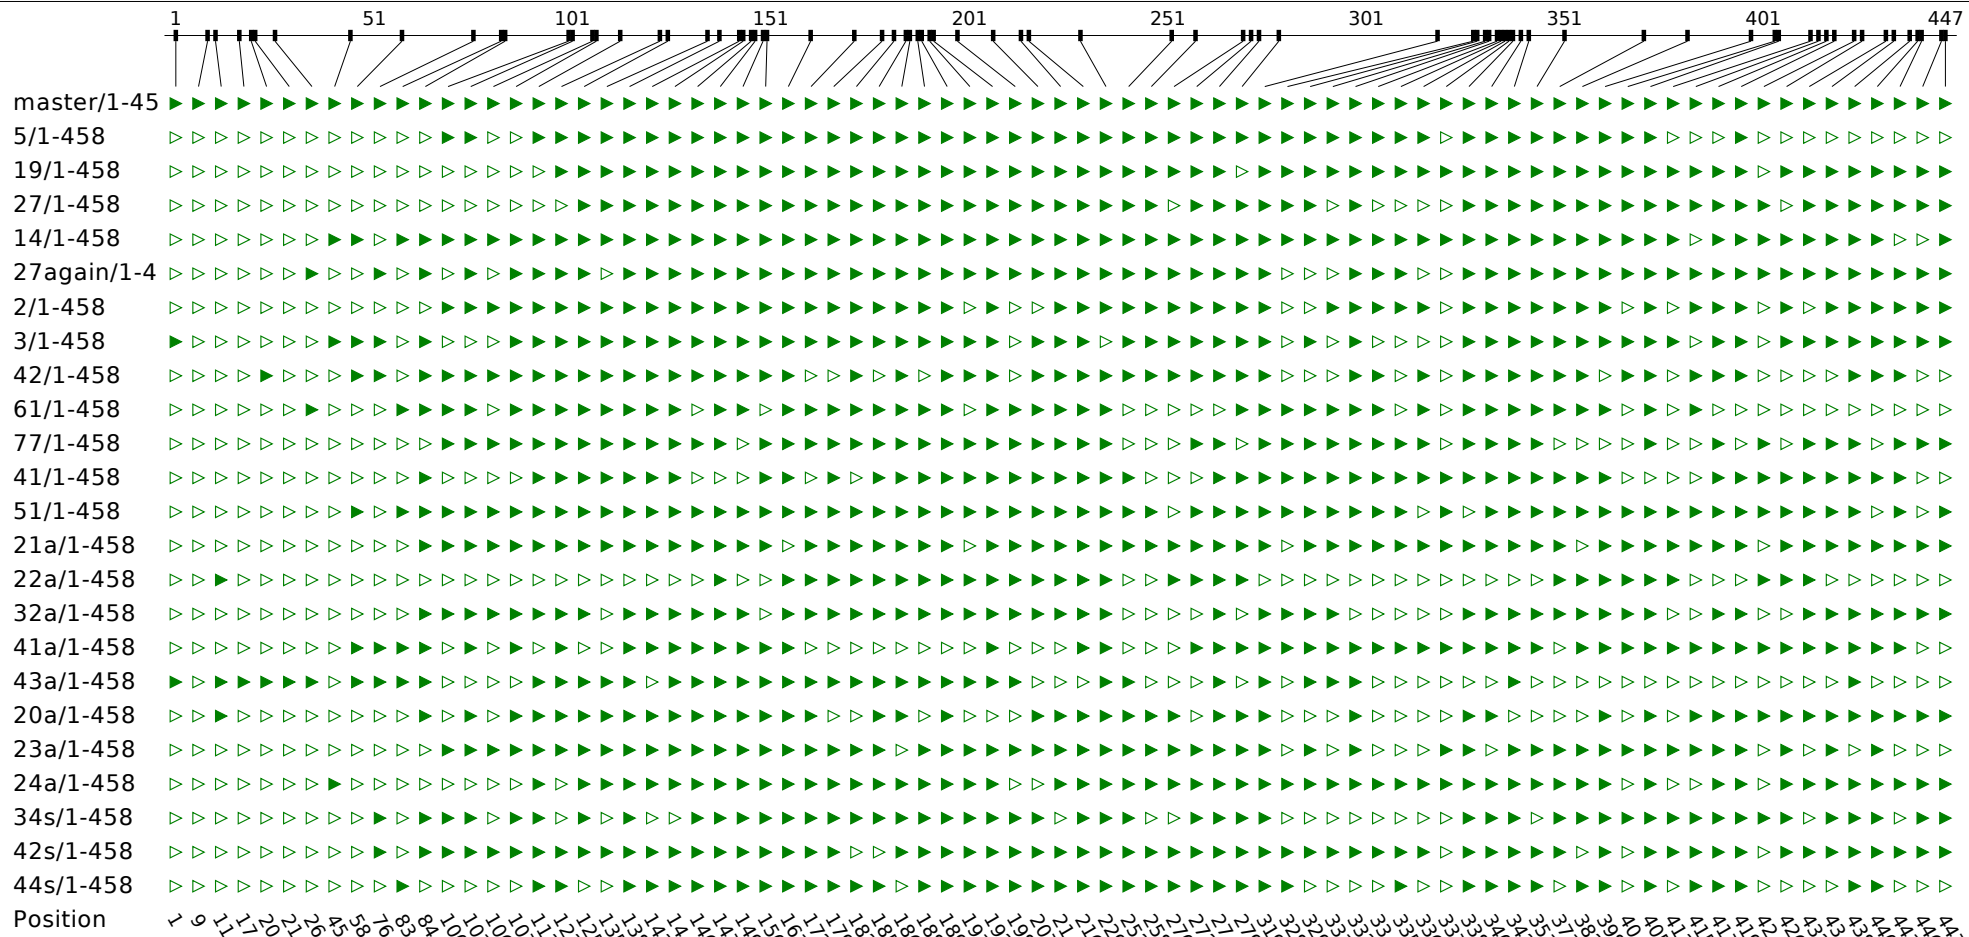

CyMATE (c) 2007, 2008  
Methylation overview of 'converted Col HS.afa'

Class 1: ● me      ○ not me  
Class 2: ■ me      □ not me  
Class 3: ► me      ▷ not me

448  
↑  
master/1-45 ►  
5/1-458 ►  
19/1-458 ►  
27/1-458 ►  
14/1-458 ►  
27again/1-4 ►  
2/1-458 ►  
3/1-458 ►  
42/1-458 ►  
61/1-458 ►  
77/1-458 ►  
41/1-458 ►  
51/1-458 ►  
21a/1-458 ►  
22a/1-458 ►  
32a/1-458 ►  
41a/1-458 ►  
43a/1-458 ▷  
20a/1-458 ►  
23a/1-458 ►  
24a/1-458 ►  
34s/1-458 ►  
42s/1-458 ►  
44s/1-458 ►  
Position 449

CyMATE (c) 2007, 2008  
 Methylation overview of 'convertedddcM.afa'

Class 1: ● me    ○ not me  
 Class 2: ■ me    □ not me  
 Class 3: ▲ me    ▼ not me

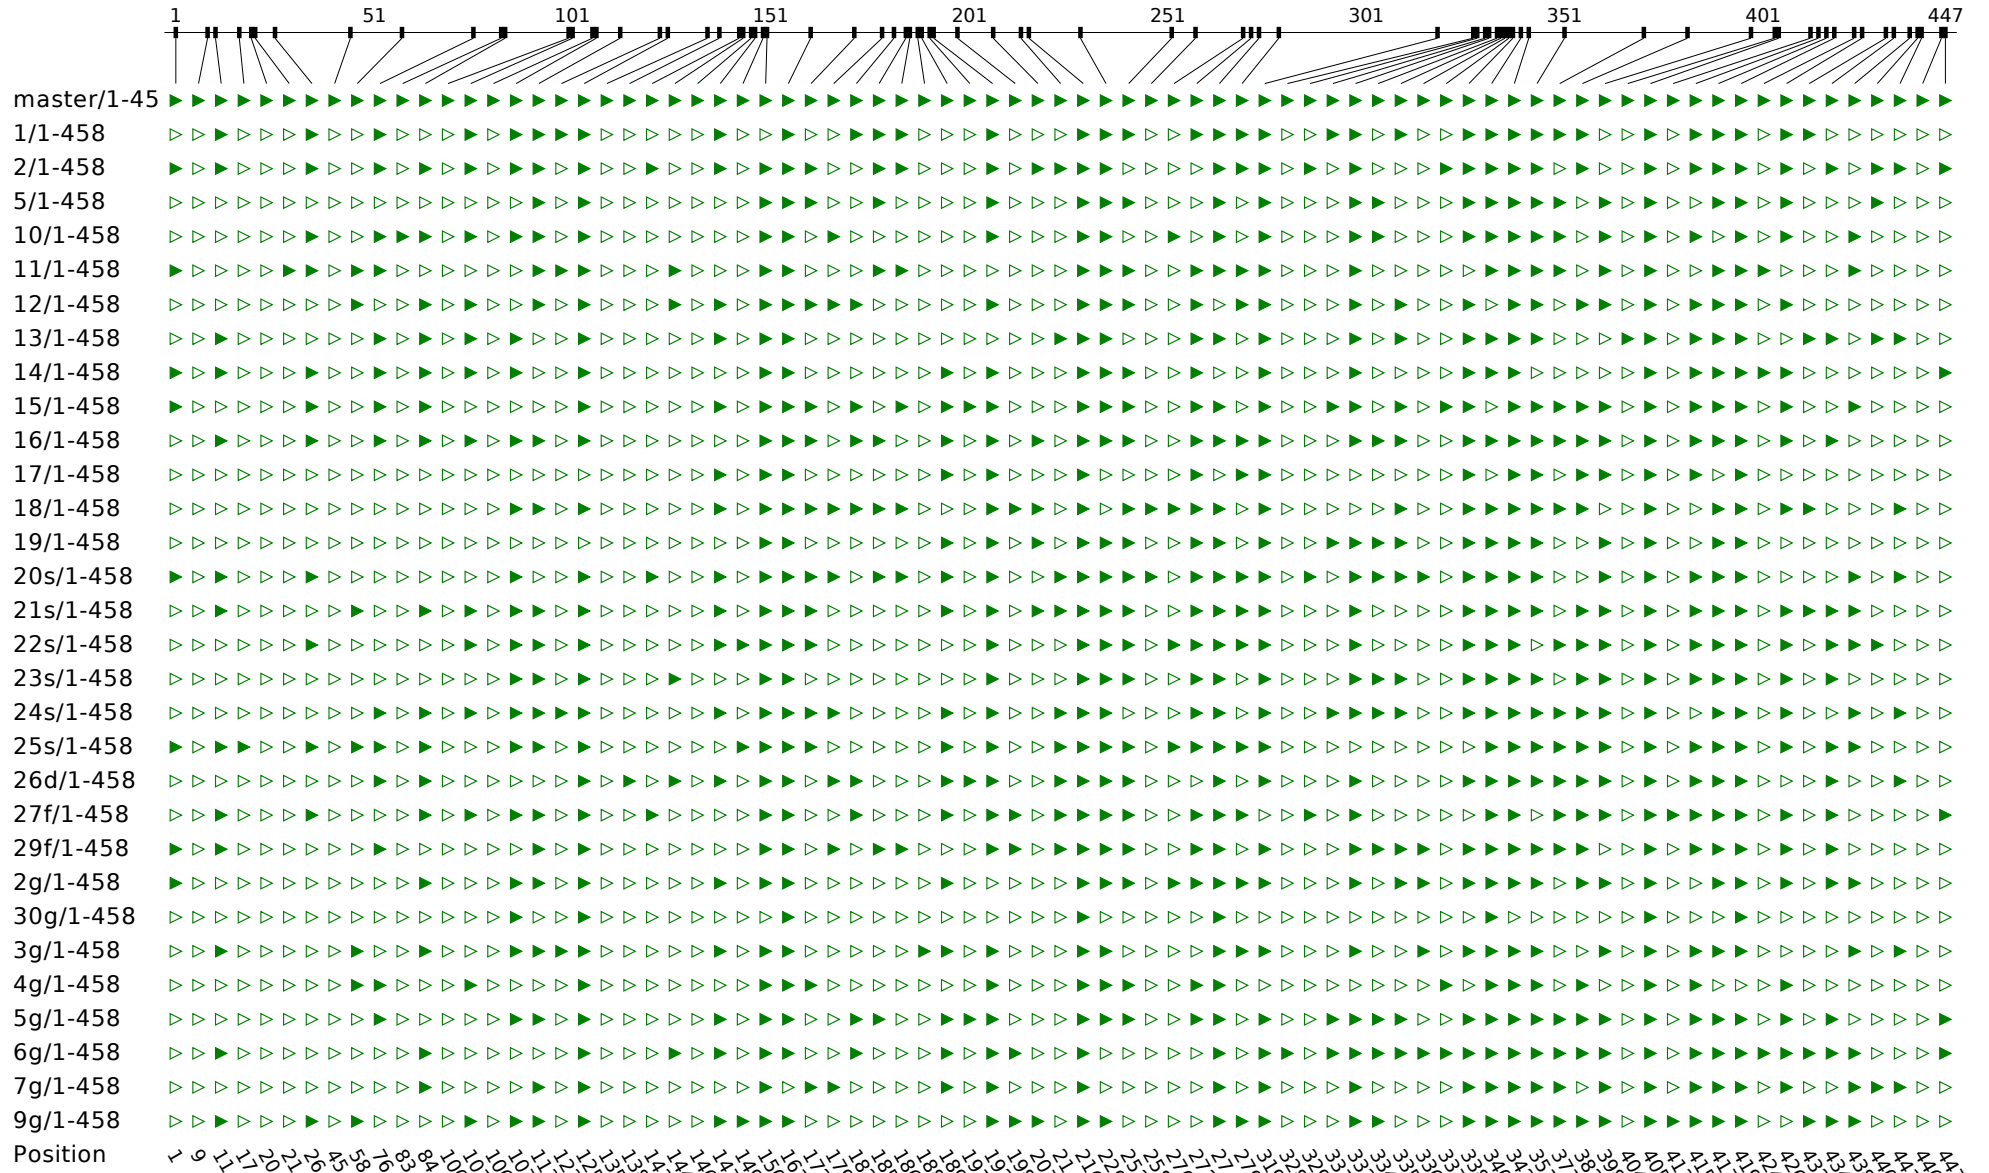

CyMATE (c) 2007, 2008  
Methylation overview of 'converteddddcM.afa'

Class 1: ● me      ○ not me  
Class 2: ■ me      □ not me  
Class 3: ► me      ▷ not me

448  
↑  
master/1-45 ►  
1/1-458 ►  
2/1-458 ►  
5/1-458 ►  
10/1-458 ►  
11/1-458 ►  
12/1-458 ►  
13/1-458 ►  
14/1-458 ►  
15/1-458 ►  
16/1-458 ►  
17/1-458 ►  
18/1-458 ►  
19/1-458 ►  
20s/1-458 ►  
21s/1-458 ►  
22s/1-458 ►  
23s/1-458 ►  
24s/1-458 ►  
25s/1-458 ▷  
26d/1-458 ►  
27f/1-458 ►  
29f/1-458 ►  
2g/1-458 ►  
30g/1-458 ►  
3g/1-458 ►  
4g/1-458 ►  
5g/1-458 ►  
6g/1-458 ►  
7g/1-458 ►  
9g/1-458 ►  
Position 449

CyMATE (c) 2007, 2008

Methylation overview of 'converteddddcHS.afa'

Class 1: ● me ○ not me  
 Class 2: ■ me □ not me  
 Class 3: ▲ me ▼ not me

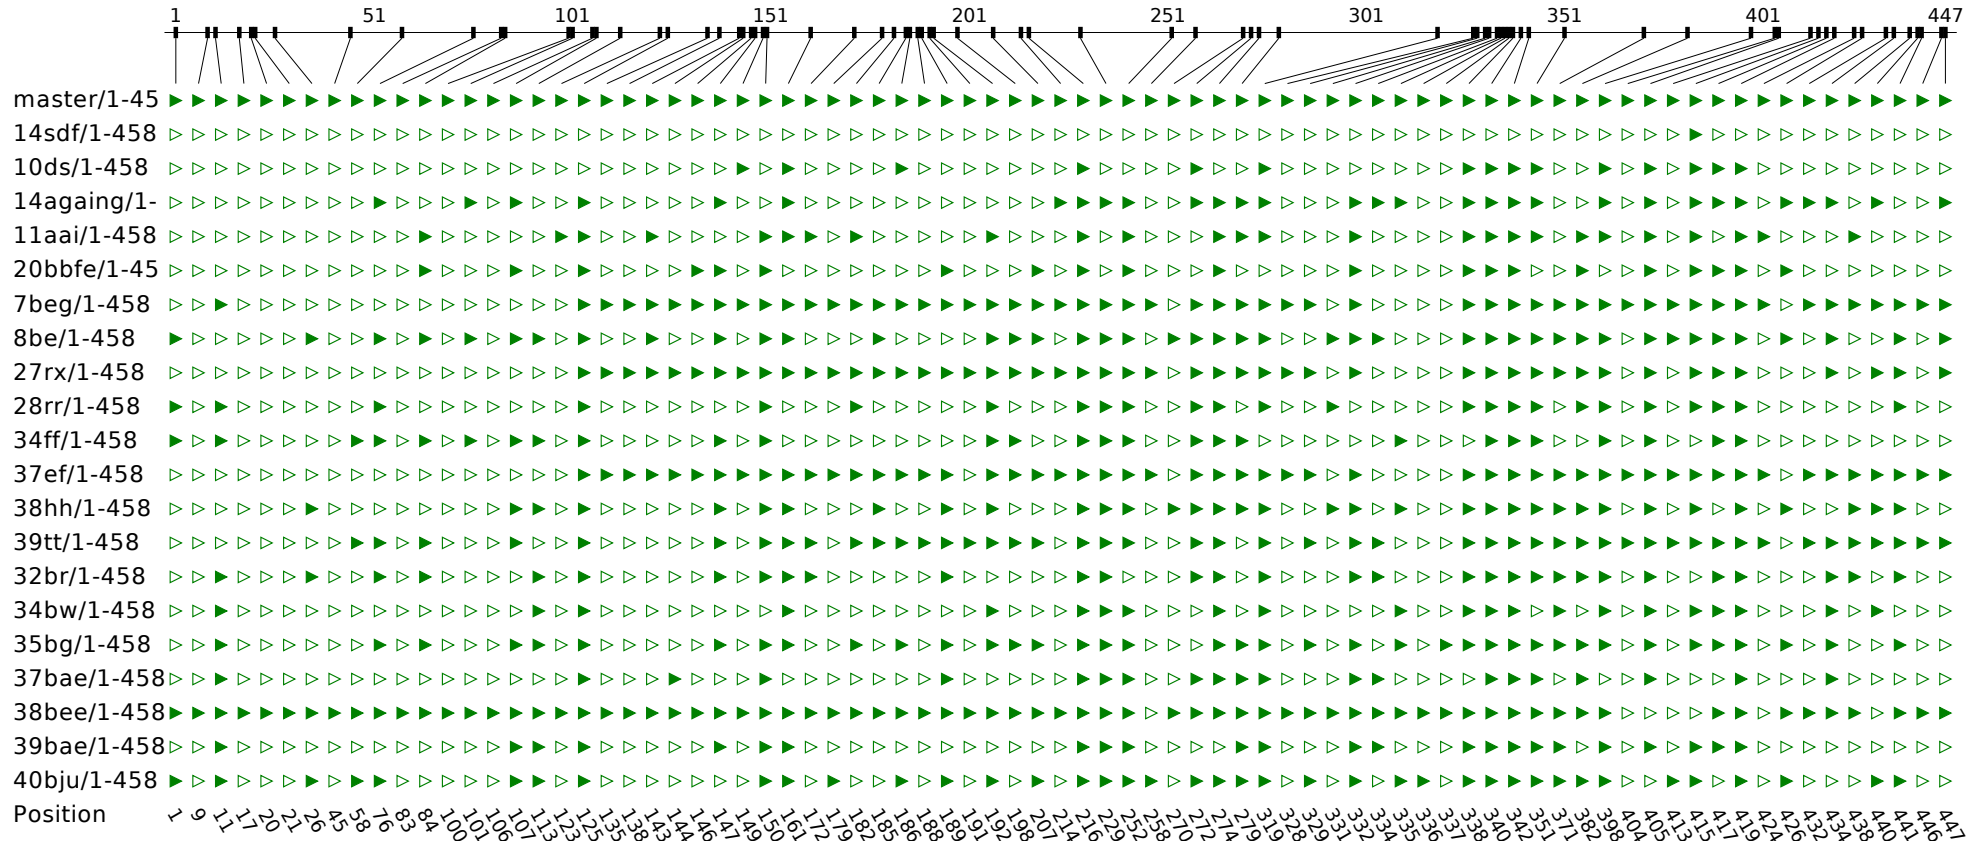

CyMATE (c) 2007, 2008  
Methylation overview of 'converteddddchs.afa'

Class 1: ● me      ○ not me  
Class 2: ■ me      □ not me  
Class 3: ► me      ▷ not me

448  
↑  
master/1-45 ►  
14sdf/1-458 ▷  
10ds/1-458 ►  
14againg/1- ►  
11aai/1-458 ►  
20bbfe/1-45 ►  
7beg/1-458 ►  
8be/1-458 ►  
27rx/1-458 ►  
28rr/1-458 ►  
34ff/1-458 ►  
37ef/1-458 ►  
38hh/1-458 ►  
39tt/1-458 ►  
32br/1-458 ►  
34bw/1-458 ►  
35bg/1-458 ►  
37bae/1-458▷  
38bee/1-458►  
39bae/1-458►  
40bjv/1-458 ►  
Position 449



**ONSEN 2 wt mock**

CyMATE (c) 2007, 2008  
Methylation overview of 'convertedColM.afa'

Class 1: ● me      ○ not me  
Class 2: ■ me      □ not me  
Class 3: ▲ me      ▼ not me

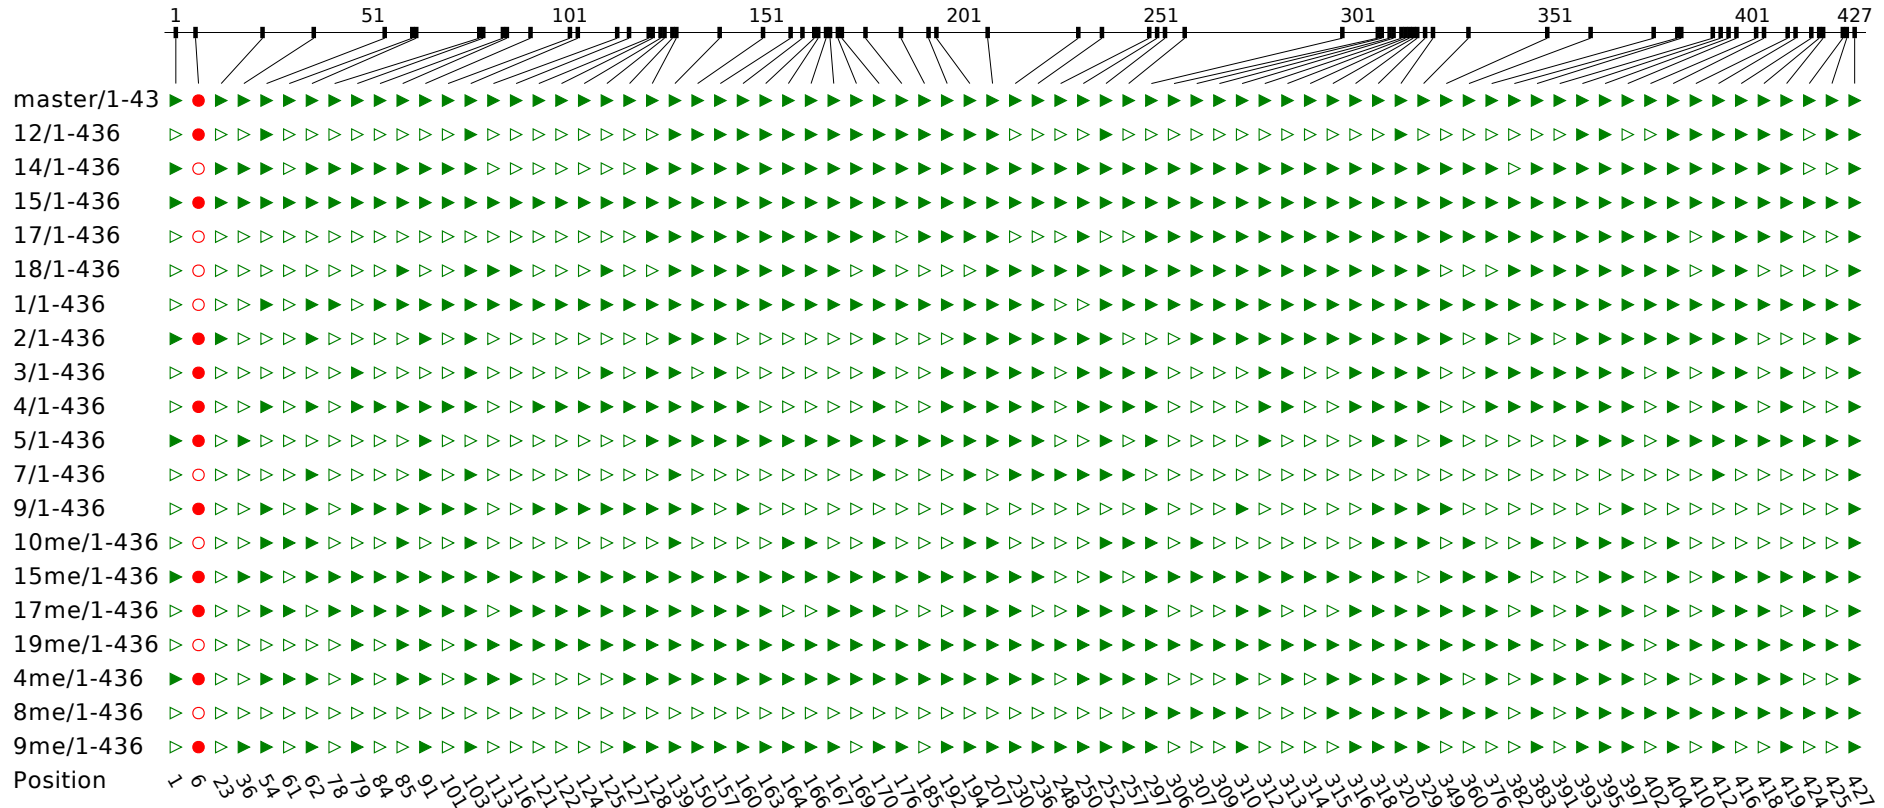

**ONSEN 2 wt HS**

CyMATE (c) 2007, 2008  
 Methylation overview of 'convertedColHS.afa'

Class 1: ● me    ○ not me  
 Class 2: ■ me    □ not me  
 Class 3: ▲ me    ▼ not me

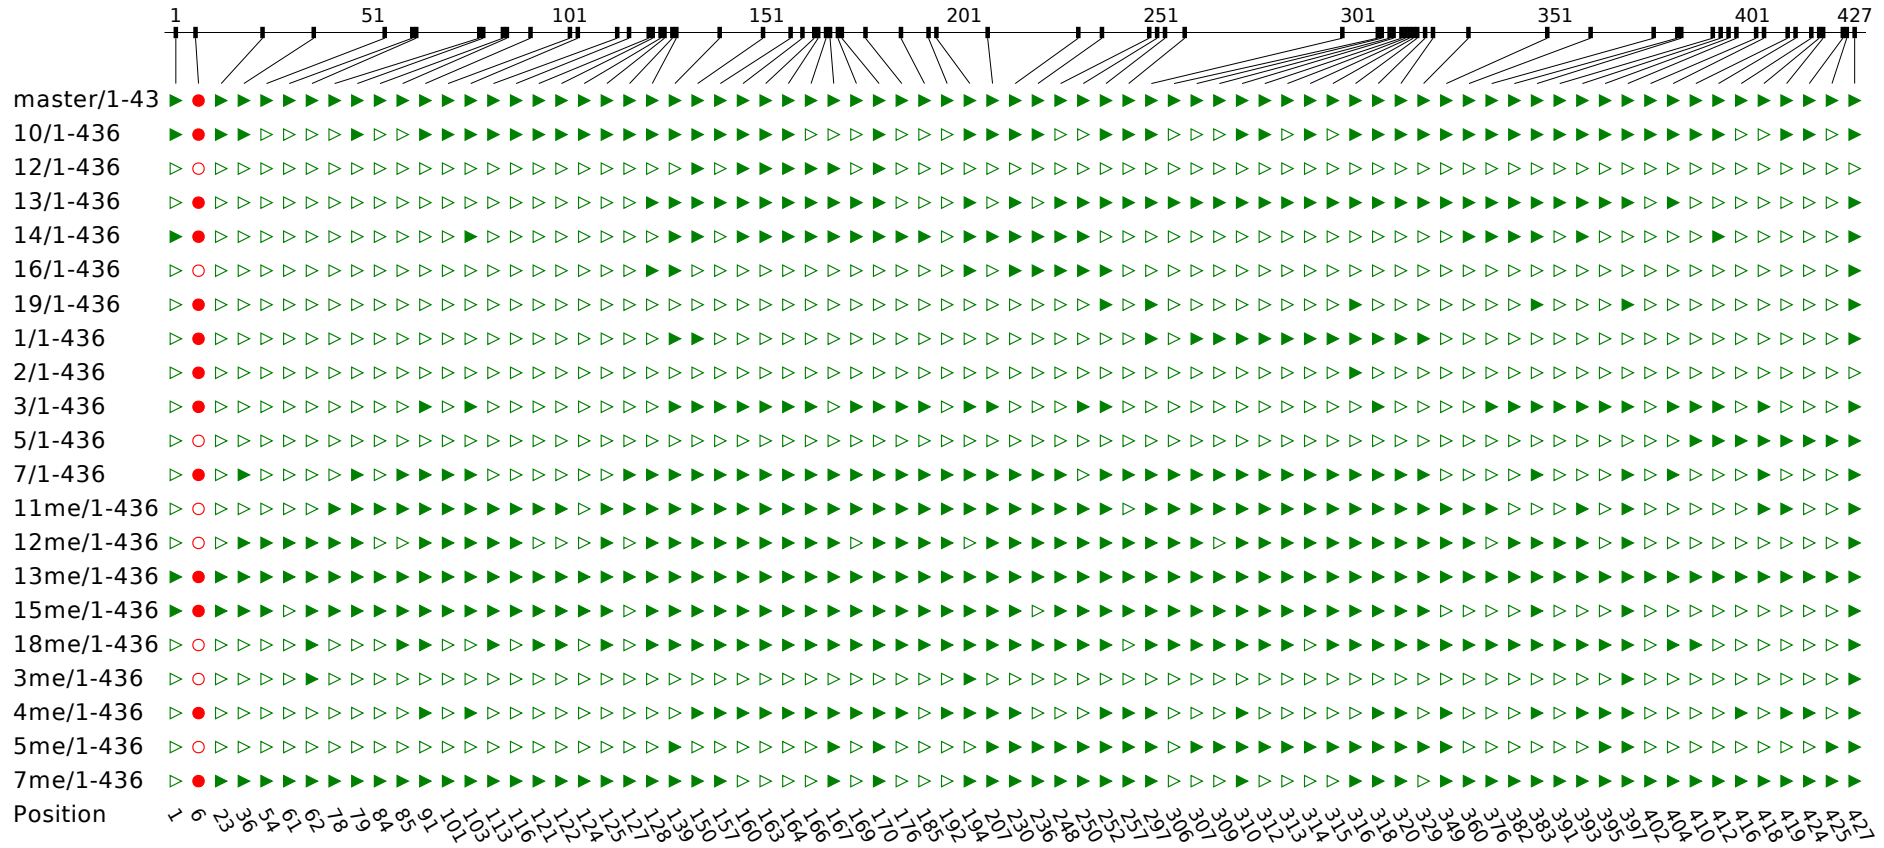

CyMATE (c) 2007, 2008  
Methylation overview of 'converteddddcM.afa'

Class 1: ● me    ○ not me  
Class 2: ■ me    □ not me  
Class 3: ▲ me    ▼ not me

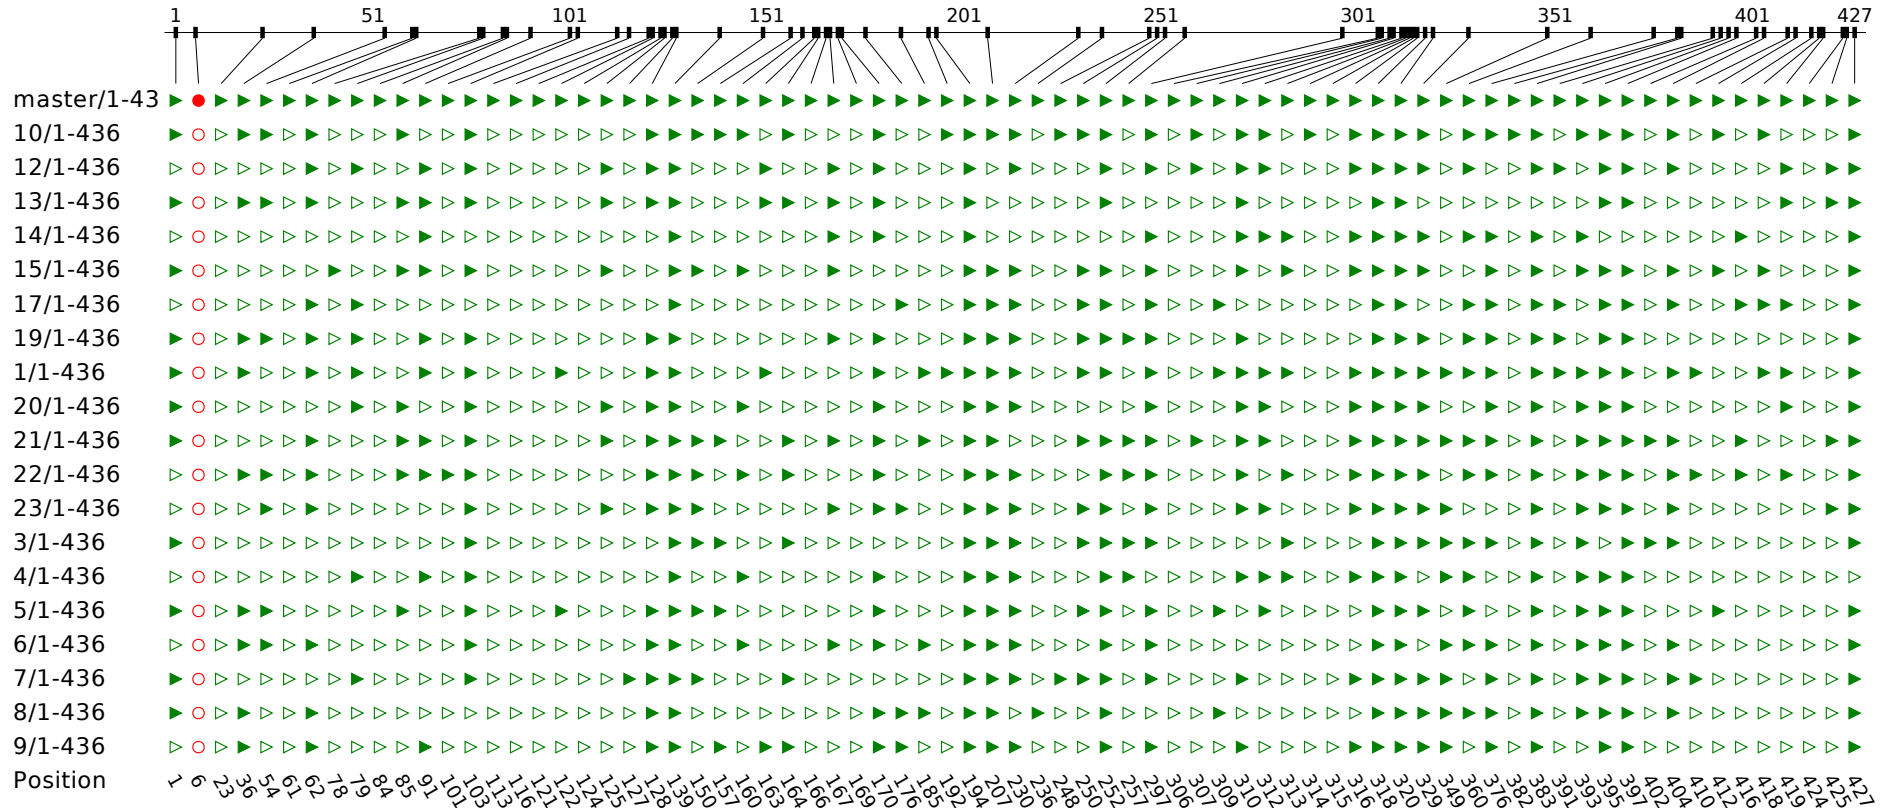

CyMATE (c) 2007, 2008  
 Methylation overview of 'convertedddcHS.afa'

Class 1: ● me      ○ not me  
 Class 2: ■ me      □ not me  
 Class 3: ► me      ◄ not me

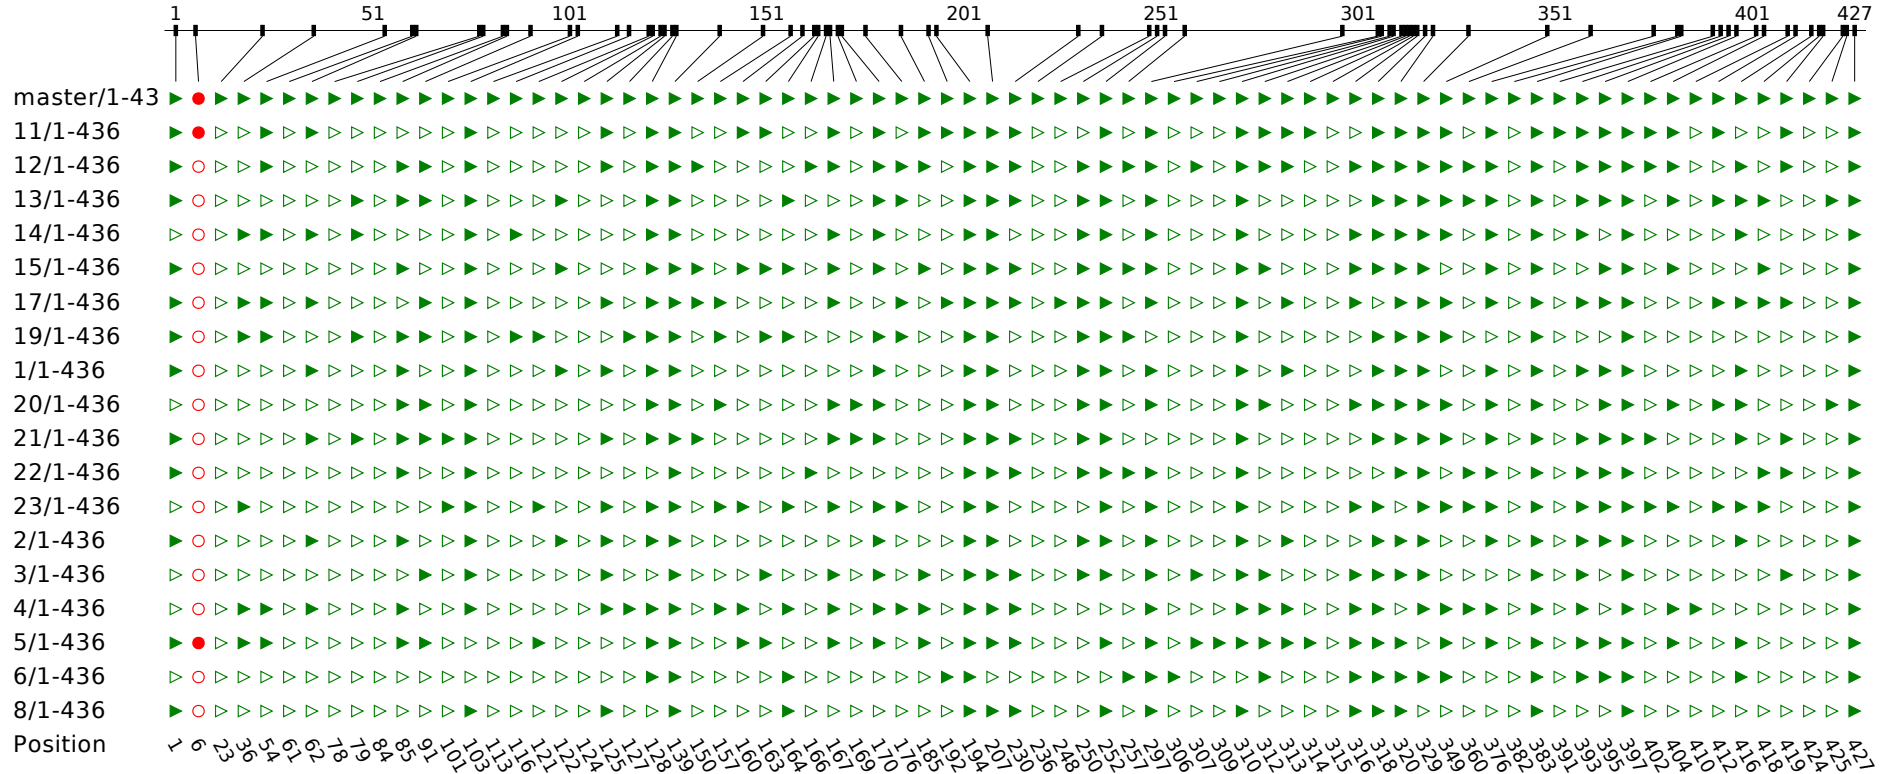

CyMATE (c) 2007, 2008  
Methylation overview of 'convertedCol M.afa'

Class 1: ● me    ○ not me  
Class 2: ■ me    □ not me  
Class 3: ▲ me    ▼ not me

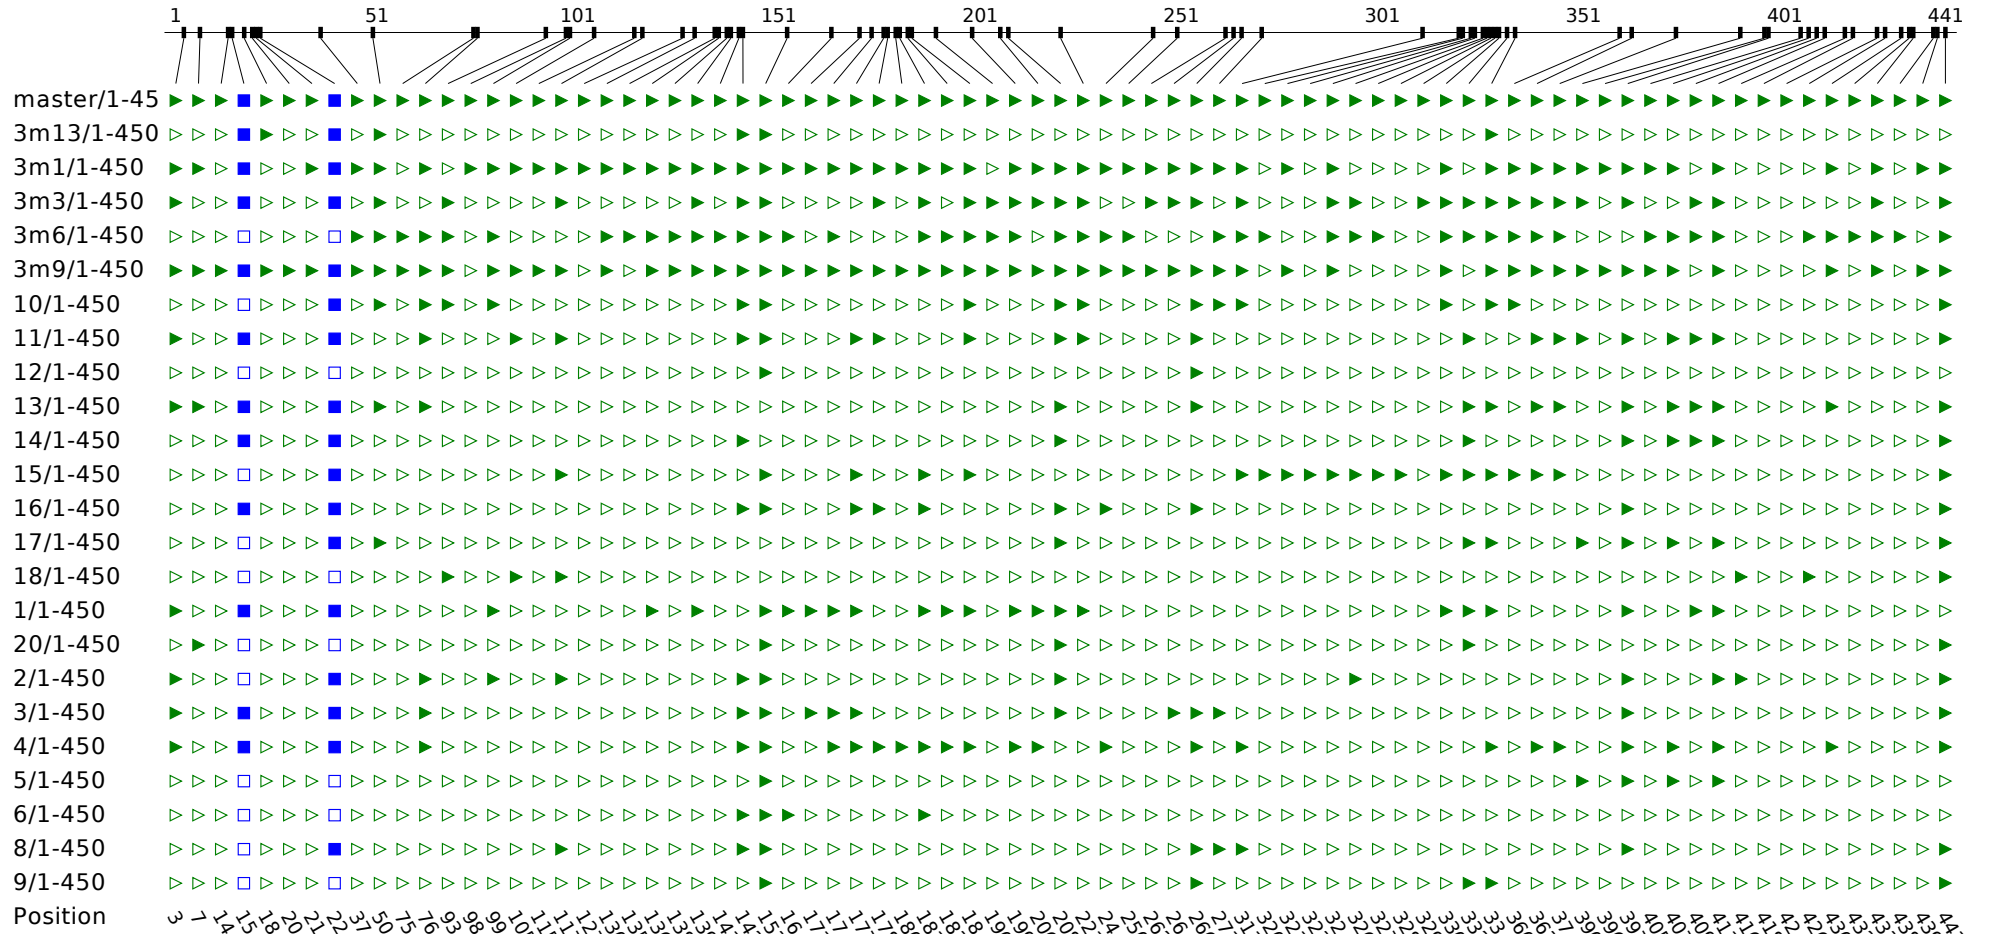

CyMATE (c) 2007, 2008  
Methylation overview of 'convertedColHS.afa'

Class 1: ● me    ○ not me  
Class 2: ■ me    □ not me  
Class 3: ▲ me    ▼ not me

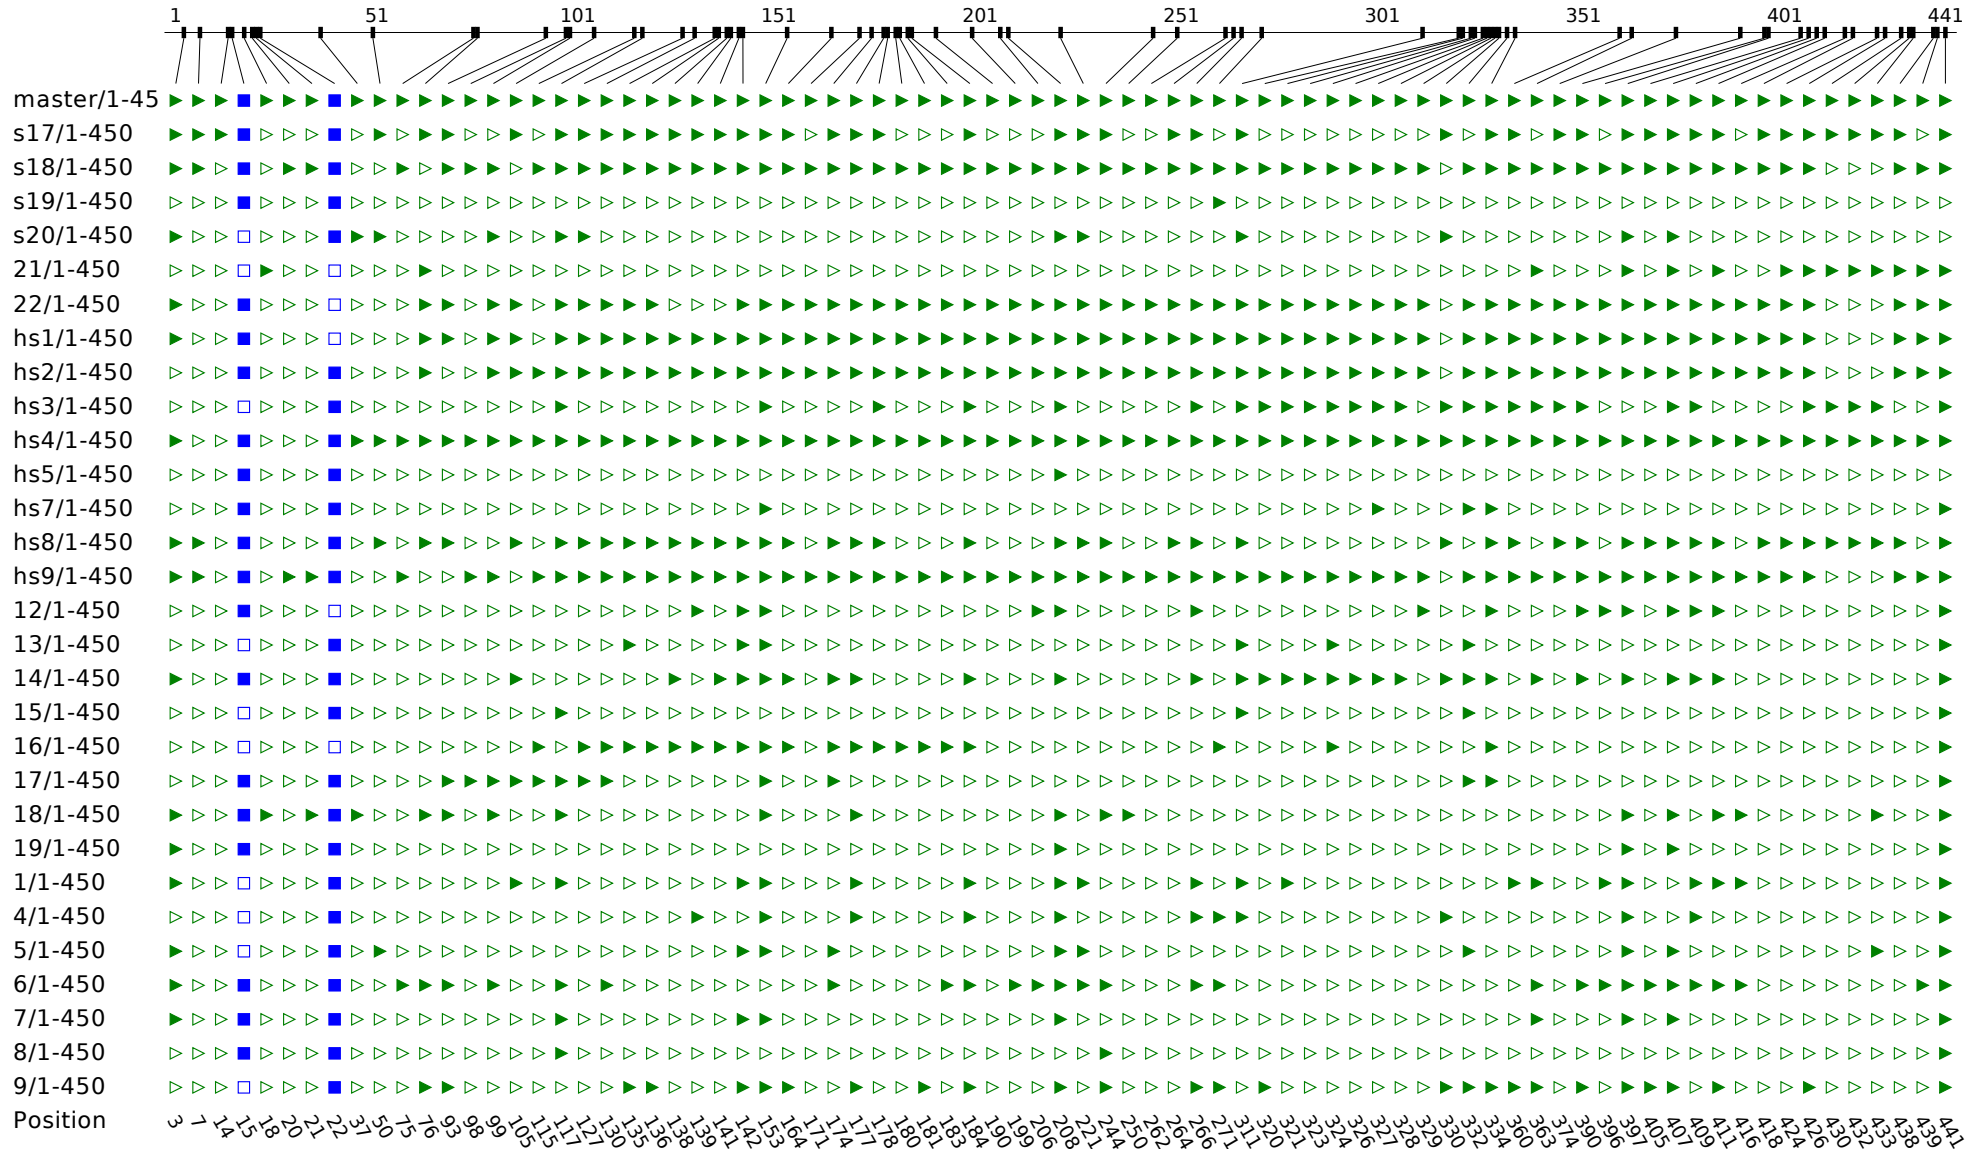

CyMATE (c) 2007, 2008  
 Methylation overview of 'convertedddcM.afa'

Class 1: ● me    ○ not me  
 Class 2: ■ me    □ not me  
 Class 3: ► me    ◄ not me

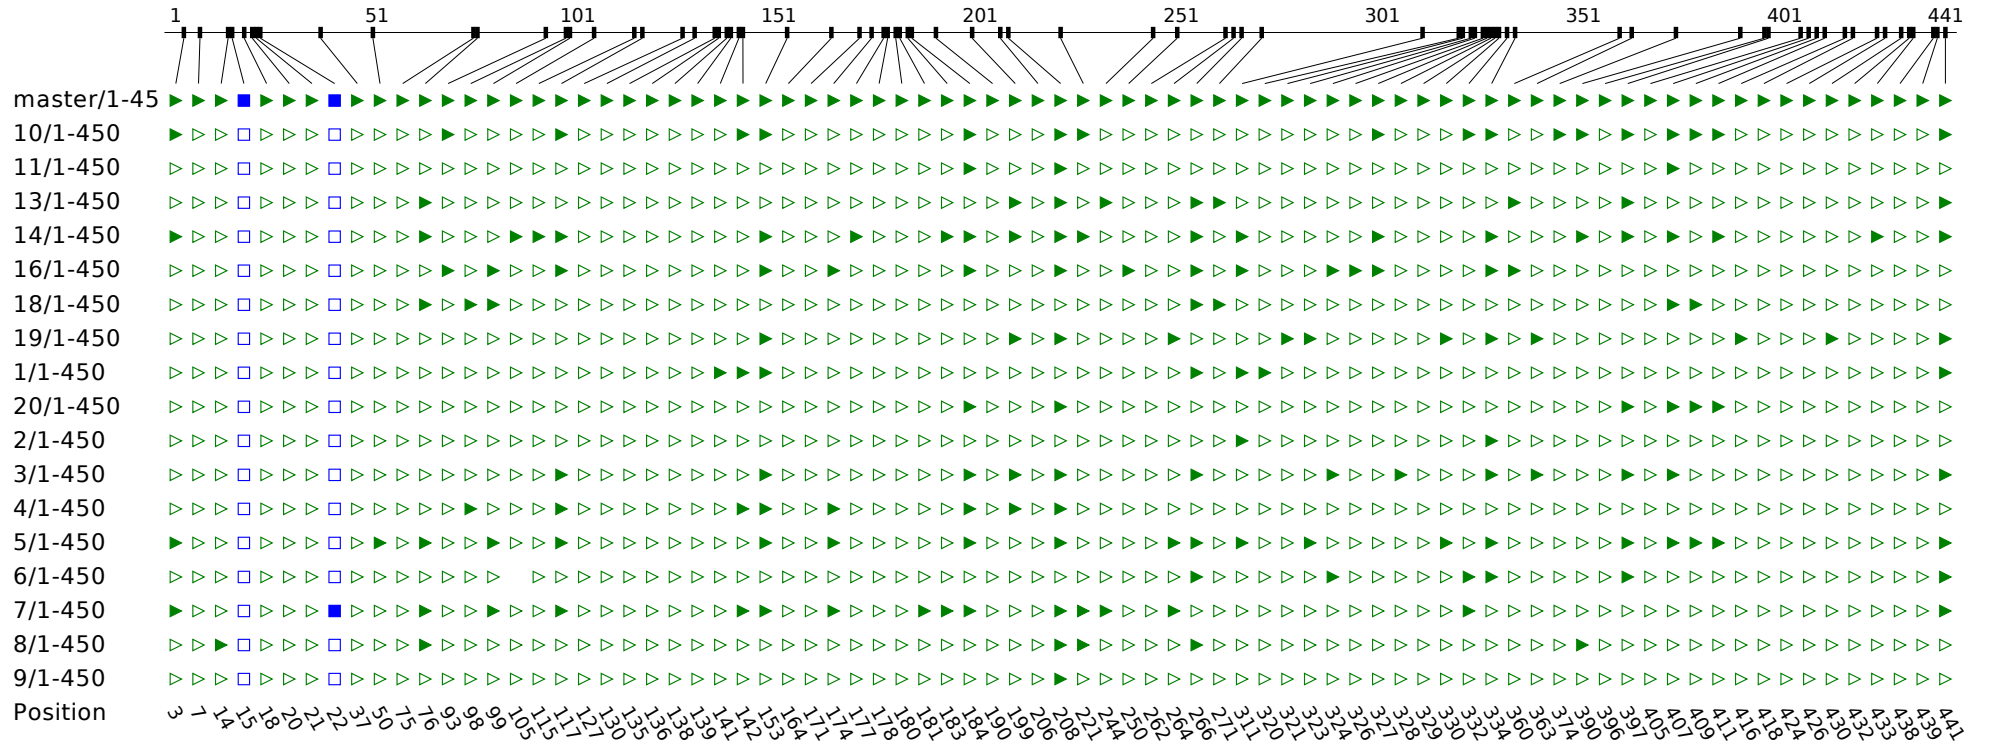

CyMATE (c) 2007, 2008  
 Methylation overview of 'convertedddcHS.afa'

Class 1: ● me    ○ not me  
 Class 2: ■ me    □ not me  
 Class 3: ▲ me    ▼ not me

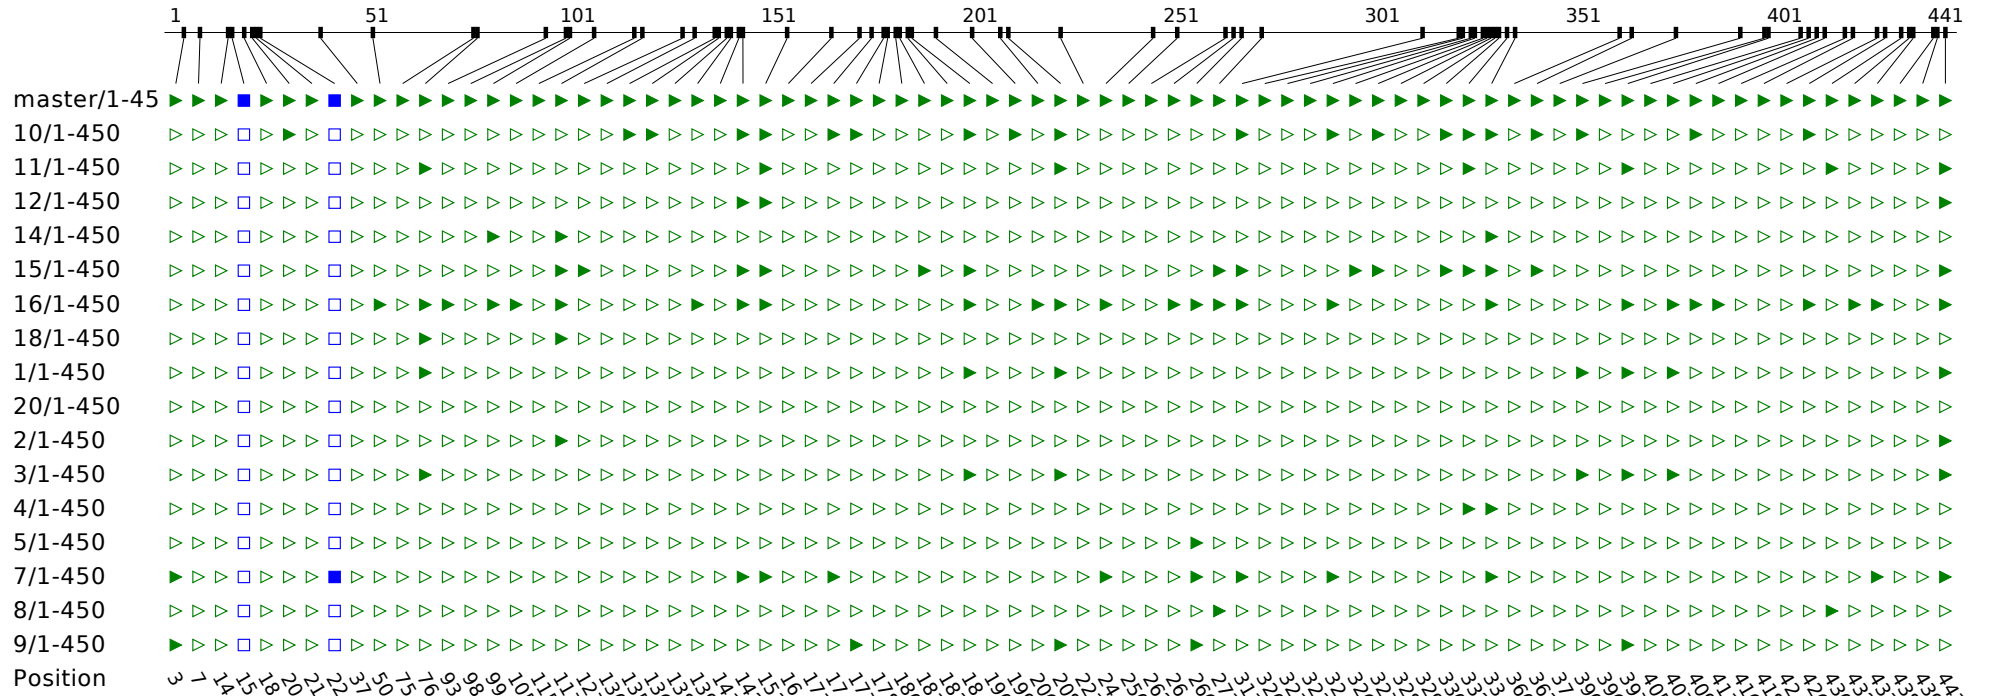

Supplement: pgen.1004115.s001.pdf [file pgen.1004115.s001.pdf]
