# Supplementary material for: How a Retrotransposon Exploits the Plant's Heat Stress Response for Its Activation
Source: PubMed Central journal article supplement (PMC3907296; doi:10.1371/journal.pgen.1004115), 2014-01-30

### WT non-stressed

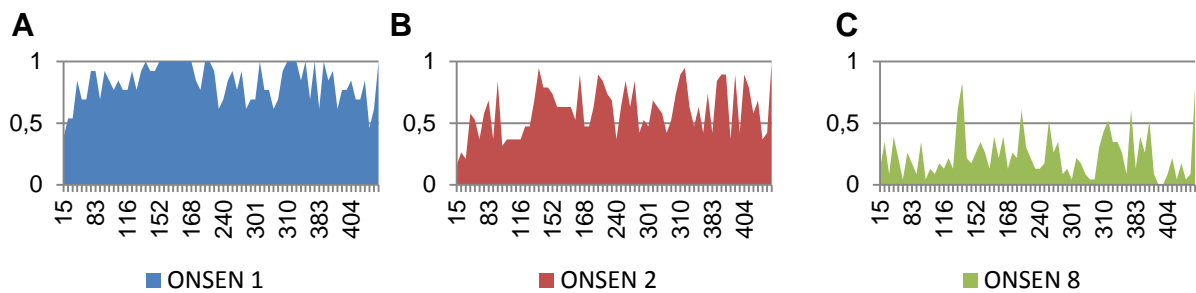

### WT 30h HS

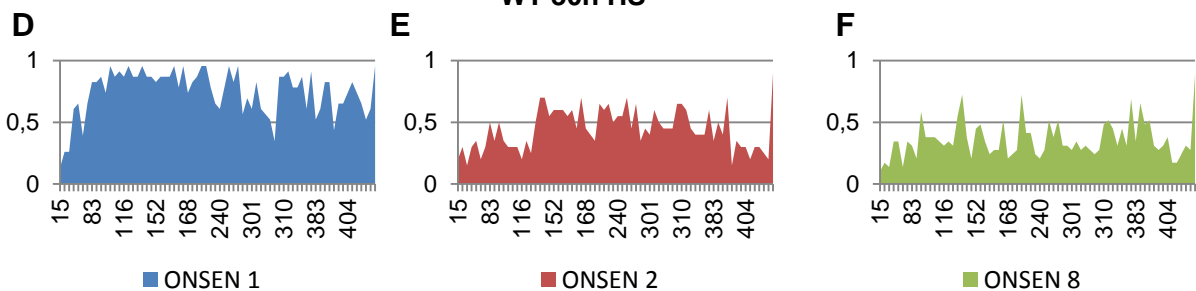

### ddc non-stressed

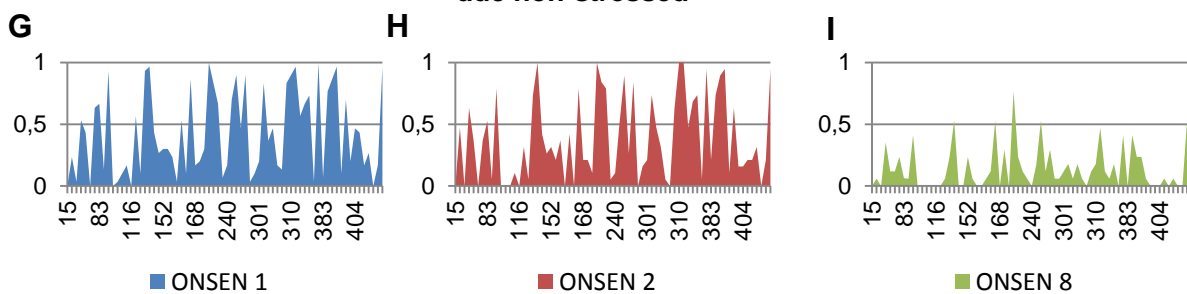

### ddc 30h HS

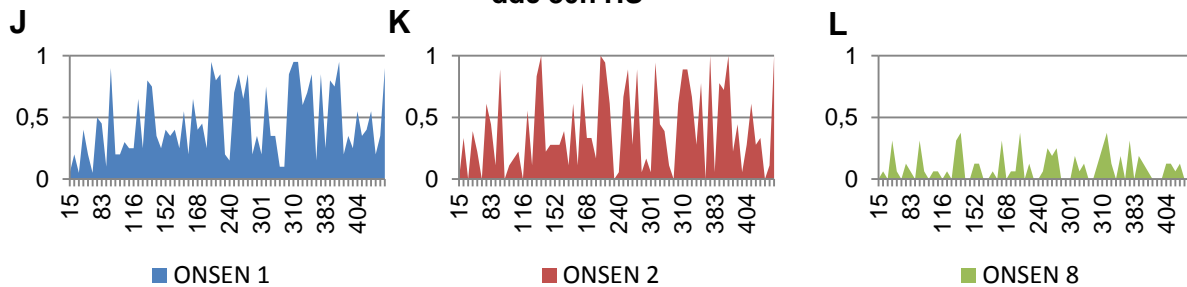

Supplement: pgen.1004115.s003.pdf [file pgen.1004115.s003.pdf]
