# Supplementary material for: How a Retrotransposon Exploits the Plant's Heat Stress Response for Its Activation
Source: PubMed Central journal article supplement (PMC3907296; doi:10.1371/journal.pgen.1004115), 2014-01-30

### Cavrak et al. Supplementary Figure 3

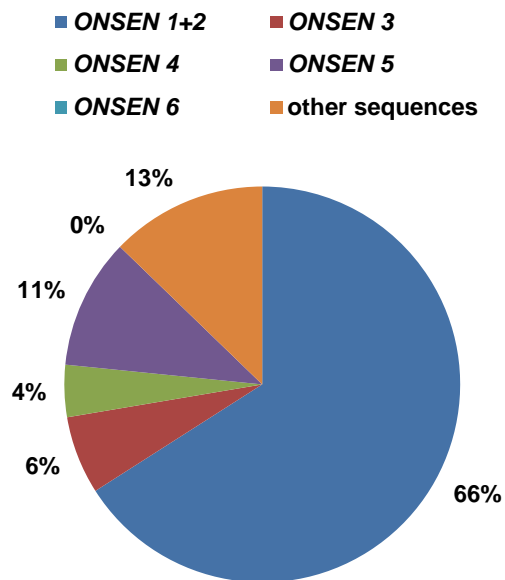

Supplement: pgen.1004115.s004.pdf [file pgen.1004115.s004.pdf]
