# Supplementary material for: How a Retrotransposon Exploits the Plant's Heat Stress Response for Its Activation
Source: PubMed Central journal article supplement (PMC3907296; doi:10.1371/journal.pgen.1004115), 2014-01-30
Supplement: pgen.1004115.s006.pdf [file pgen.1004115.s006.pdf]

**Cavrak et al. Supplementary Table 1**

| <b>SNP deviation from At1g48710</b> | <b>Position</b> |
|-------------------------------------|-----------------|
| C, if G then At1g21945              | 37              |
| A, if T then At3g59720              | 42              |
| C, if T then At5g13205              | 152             |
| T, if C then At3g32415              | 192             |
| T, if C then At3g32415              | 195             |
| T, if G then At1g21945              | 213             |
| C, if A then At3g32415              | 233             |
| T, if G then At3g32415              | 247             |
| G, if A then At3g59720              | 250             |
| A, if C then At3g61330              | 262             |
| A, if T then At3g32415              | 279             |
| C, if T then At3g32415              | 312             |
| G, if A then At3g32415              | 334             |
| G, if - then At3g32415              | 386             |
| C, if T then At3g32415              | 399             |
| C, if T then At3g32415              | 477             |
| T, if C then At3g32415              | 486             |
| G, if A then At3g32415              | 488             |
| T, if C then At3g32415              | 498             |
| C, if T then At3g32415              | 548             |
| G, if A then At1g11265 OR At3g61330 | 331             |
| T, if C then At5g13205              | 395             |
| C, if T then At1g58140              | 483             |
| T, if A then At1g21945              | 516             |
