# Supplementary material for: How a Retrotransposon Exploits the Plant's Heat Stress Response for Its Activation
Source: PubMed Central journal article supplement (PMC3907296; doi:10.1371/journal.pgen.1004115), 2014-01-30
Supplement: pgen.1004115.s007.pdf [file pgen.1004115.s007.pdf]

## Cavrak et al. Supplementary Table 2

### Sequences of oligonucleotides

| Gene            | Forward primer                                     | Reverse primer                                      | Purpose                   |
|-----------------|----------------------------------------------------|-----------------------------------------------------|---------------------------|
| ONSEN           | CCACAAGAGGAACCAACGAA                               | TTCGATCATGGAAGACCGG                                 | RT-qPCR                   |
| ATSAND          | AACTCTATGCAGCATTTGATCCACT                          | TGATTGCATATCTTTATCGCCATC                            | RT-qPCR                   |
| ONSEN-SNPs      | GAAAACGGCCAAAGTTACCA                               | AGTTGTCCAAGGCTCAAGATG                               | SNP sequencing            |
| HSFA2           | GTGTTGAGGTTGGGCAATACG                              | CTCCTTAGTAGGCATCGAATTATTCG                          | Northern probe            |
| At1g11265 ONSEN | AAGAGATATTTAYTGAGAT                                | ATACCACTTTRTTARARTAAA                               | Bisulfite sequencing      |
| At3g32415 ONSEN | ATATGTGGYAGATYAAAYAGA                              | ATACCACTTTRTTARARTAAA                               | Bisulfite sequencing      |
| At3g61330 ONSEN | TGGTATAAAGTGTGTATYTT                               | ATACCACTTTRTTARARTAAA                               | Bisulfite sequencing      |
| HSFA2           | GTGTTGAGGTTGGGCAATACG                              | TTGCTGTTGCCTCAACCTAACTAC                            | RT-qPCR                   |
| ONSEN           | TGTTGAAAGTTAAACTTGATTTTGAAT                        | TGTTAGAGTAAAATTCCTTTTAGAGGT                         | LTR for EMSA              |
| ONSEN           | CCACCTCCTTAAAAGATTCTAGAAATTTTCTAGAATCATCTCCACCTCCT | AGGAGGTGGAAGATGATTCTAGAAAATTTCTAGAATCTTTTAAGGAGGTGG | Complete HRE              |
| HSFA2           | AGCTCATATGGAAGAACTGAAAGTGGAAATGGAGG                | AGCTCTCGAGAGGTTCCGAACCAAGAAAACCCATTTG               | Making His-tagged protein |
| ONSEN           | AATACCTCCTCCCCCTCTCA                               | ATCCTTGATAGATTAGACAGAGAGCT                          | Southern probe            |
| HSFA2           | GTTAGAAATGGGYTTAAGTAAAGG                           | CCTCCATTTCCACTTTCARTTCTTCC                          | Bisulfite sequencing      |
